# Supplementary material
Source: publisher figshare collection journal article supplement (https://acs.figshare.com/ndownloader/files/10959821)
Supplement: Supplementary file 1 [file 10959821]

CRYST1   58.571   58.571   58.571  90.00  90.00  90.00 P 1           1
ATOM      1  N   ASP A   1      17.004 -26.098  12.831  0.00  0.00      A    N
ATOM      2  HT1 ASP A   1      17.381 -25.487  13.583  0.00  0.00      A    H
ATOM      3  HT2 ASP A   1      16.014 -26.303  13.075  0.00  0.00      A    H
ATOM      4  HT3 ASP A   1      16.836 -25.501  11.996  0.00  0.00      A    H
ATOM      5  CA  ASP A   1      17.810 -27.319  12.560  0.00  0.00      A    C
ATOM      6  HA  ASP A   1      17.934 -27.812  13.513  0.00  0.00      A    H
ATOM      7  CB  ASP A   1      16.895 -28.252  11.661  0.00  0.00      A    C
ATOM      8  HB1 ASP A   1      16.703 -27.867  10.636  0.00  0.00      A    H
ATOM      9  HB2 ASP A   1      15.974 -28.451  12.249  0.00  0.00      A    H
ATOM     10  CG  ASP A   1      17.382 -29.672  11.386  0.00  0.00      A    C
ATOM     11  OD1 ASP A   1      18.211 -30.157  12.189  0.00  0.00      A    O
ATOM     12  OD2 ASP A   1      16.861 -30.345  10.486  0.00  0.00      A    O
ATOM     13  C   ASP A   1      19.115 -26.880  12.030  0.00  0.00      A    C
ATOM     14  O   ASP A   1      19.549 -25.708  12.075  0.00  0.00      A    O
ATOM     15  N   ASP A   2      19.880 -27.851  11.454  0.00  0.00      A    N
ATOM     16  HN  ASP A   2      19.514 -28.769  11.586  0.00  0.00      A    H
ATOM     17  CA  ASP A   2      21.105 -27.603  10.723  0.00  0.00      A    C
ATOM     18  HA  ASP A   2      21.722 -26.910  11.276  0.00  0.00      A    H
ATOM     19  CB  ASP A   2      21.731 -28.966  10.538  0.00  0.00      A    C
ATOM     20  HB1 ASP A   2      22.758 -28.857  10.128  0.00  0.00      A    H
ATOM     21  HB2 ASP A   2      21.133 -29.613   9.861  0.00  0.00      A    H
ATOM     22  CG  ASP A   2      22.020 -29.626  11.944  0.00  0.00      A    C
ATOM     23  OD1 ASP A   2      22.524 -29.011  12.887  0.00  0.00      A    O
ATOM     24  OD2 ASP A   2      21.759 -30.810  12.042  0.00  0.00      A    O
ATOM     25  C   ASP A   2      20.880 -27.038   9.352  0.00  0.00      A    C
ATOM     26  O   ASP A   2      21.647 -26.203   8.934  0.00  0.00      A    O
ATOM     27  N   GLN A   3      19.886 -27.504   8.591  0.00  0.00      A    N
ATOM     28  HN  GLN A   3      19.243 -28.211   8.874  0.00  0.00      A    H
ATOM     29  CA  GLN A   3      19.572 -26.813   7.349  0.00  0.00      A    C
ATOM     30  HA  GLN A   3      20.376 -26.135   7.102  0.00  0.00      A    H
ATOM     31  CB  GLN A   3      19.353 -27.709   6.183  0.00  0.00      A    C
ATOM     32  HB1 GLN A   3      19.201 -27.091   5.272  0.00  0.00      A    H
ATOM     33  HB2 GLN A   3      18.428 -28.318   6.272  0.00  0.00      A    H
ATOM     34  CG  GLN A   3      20.563 -28.605   5.910  0.00  0.00      A    C
ATOM     35  HG1 GLN A   3      20.376 -29.529   6.497  0.00  0.00      A    H
ATOM     36  HG2 GLN A   3      21.448 -28.100   6.353  0.00  0.00      A    H
ATOM     37  CD  GLN A   3      20.875 -28.960   4.484  0.00  0.00      A    C
ATOM     38  OE1 GLN A   3      20.706 -30.078   3.965  0.00  0.00      A    O
ATOM     39  NE2 GLN A   3      21.469 -27.941   3.799  0.00  0.00      A    N
ATOM     40 HE21 GLN A   3      21.624 -28.110   2.825  0.00  0.00      A    H
ATOM     41 HE22 GLN A   3      21.446 -26.990   4.106  0.00  0.00      A    H
ATOM     42  C   GLN A   3      18.325 -25.965   7.507  0.00  0.00      A    C
ATOM     43  O   GLN A   3      17.462 -26.204   8.330  0.00  0.00      A    O
ATOM     44  N   GLN A   4      18.225 -24.950   6.597  0.00  0.00      A    N
ATOM     45  HN  GLN A   4      18.791 -24.865   5.781  0.00  0.00      A    H
ATOM     46  CA  GLN A   4      17.173 -23.973   6.696  0.00  0.00      A    C
ATOM     47  HA  GLN A   4      16.478 -24.183   7.496  0.00  0.00      A    H
ATOM     48  CB  GLN A   4      17.681 -22.475   6.825  0.00  0.00      A    C
ATOM     49  HB1 GLN A   4      16.921 -21.664   6.824  0.00  0.00      A    H
ATOM     50  HB2 GLN A   4      18.344 -22.333   5.944  0.00  0.00      A    H
ATOM     51  CG  GLN A   4      18.595 -22.147   7.998  0.00  0.00      A    C
ATOM     52  HG1 GLN A   4      18.782 -21.054   8.069  0.00  0.00      A    H
ATOM     53  HG2 GLN A   4      19.573 -22.584   7.703  0.00  0.00      A    H
ATOM     54  CD  GLN A   4      18.158 -22.809   9.313  0.00  0.00      A    C
ATOM     55  OE1 GLN A   4      16.994 -22.891   9.580  0.00  0.00      A    O
ATOM     56  NE2 GLN A   4      19.046 -23.226  10.220  0.00  0.00      A    N
ATOM     57 HE21 GLN A   4      18.689 -23.412  11.136  0.00  0.00      A    H
ATOM     58 HE22 GLN A   4      20.029 -23.121  10.071  0.00  0.00      A    H
ATOM     59  C   GLN A   4      16.395 -23.999   5.418  0.00  0.00      A    C
ATOM     60  O   GLN A   4      16.458 -24.862   4.557  0.00  0.00      A    O
ATOM     61  N   GLN A   5      15.509 -23.044   5.323  0.00  0.00      A    N
ATOM     62  HN  GLN A   5      15.619 -22.201   5.843  0.00  0.00      A    H
ATOM     63  CA  GLN A   5      14.546 -22.819   4.209  0.00  0.00      A    C
ATOM     64  HA  GLN A   5      14.596 -23.798   3.755  0.00  0.00      A    H
ATOM     65  CB  GLN A   5      13.082 -22.552   4.556  0.00  0.00      A    C
ATOM     66  HB1 GLN A   5      12.466 -23.458   4.741  0.00  0.00      A    H
ATOM     67  HB2 GLN A   5      12.558 -22.048   3.716  0.00  0.00      A    H
ATOM     68  CG  GLN A   5      12.659 -21.631   5.805  0.00  0.00      A    C
ATOM     69  HG1 GLN A   5      12.806 -22.188   6.755  0.00  0.00      A    H
ATOM     70  HG2 GLN A   5      11.616 -21.262   5.705  0.00  0.00      A    H
ATOM     71  CD  GLN A   5      13.567 -20.463   5.909  0.00  0.00      A    C
ATOM     72  OE1 GLN A   5      14.473 -20.473   6.712  0.00  0.00      A    O
ATOM     73  NE2 GLN A   5      13.311 -19.452   5.062  0.00  0.00      A    N
ATOM     74 HE21 GLN A   5      13.842 -18.606   5.101  0.00  0.00      A    H
ATOM     75 HE22 GLN A   5      12.580 -19.591   4.393  0.00  0.00      A    H
ATOM     76  C   GLN A   5      15.082 -21.877   3.154  0.00  0.00      A    C
ATOM     77  O   GLN A   5      15.844 -20.911   3.406  0.00  0.00      A    O
ATOM     78  N   GLN A   6      14.853 -22.253   1.827  0.00  0.00      A    N
ATOM     79  HN  GLN A   6      14.314 -23.078   1.678  0.00  0.00      A    H
ATOM     80  CA  GLN A   6      15.813 -22.027   0.804  0.00  0.00      A    C
ATOM     81  HA  GLN A   6      16.269 -21.050   0.854  0.00  0.00      A    H
ATOM     82  CB  GLN A   6      16.860 -23.212   0.828  0.00  0.00      A    C
ATOM     83  HB1 GLN A   6      17.480 -23.111  -0.088  0.00  0.00      A    H
ATOM     84  HB2 GLN A   6      16.350 -24.192   0.949  0.00  0.00      A    H
ATOM     85  CG  GLN A   6      17.913 -23.110   2.008  0.00  0.00      A    C
ATOM     86  HG1 GLN A   6      18.732 -23.808   1.731  0.00  0.00      A    H
ATOM     87  HG2 GLN A   6      17.479 -23.387   2.993  0.00  0.00      A    H
ATOM     88  CD  GLN A   6      18.443 -21.661   2.075  0.00  0.00      A    C
ATOM     89  OE1 GLN A   6      18.593 -20.870   1.103  0.00  0.00      A    O
ATOM     90  NE2 GLN A   6      19.009 -21.316   3.252  0.00  0.00      A    N
ATOM     91 HE21 GLN A   6      19.745 -20.640   3.283  0.00  0.00      A    H
ATOM     92 HE22 GLN A   6      18.987 -22.143   3.814  0.00  0.00      A    H
ATOM     93  C   GLN A   6      14.981 -22.134  -0.418  0.00  0.00      A    C
ATOM     94  O   GLN A   6      13.890 -22.772  -0.420  0.00  0.00      A    O
ATOM     95  N   GLN A   7      15.364 -21.556  -1.537  0.00  0.00      A    N
ATOM     96  HN  GLN A   7      16.308 -21.238  -1.484  0.00  0.00      A    H
ATOM     97  CA  GLN A   7      14.623 -21.682  -2.842  0.00  0.00      A    C
ATOM     98  HA  GLN A   7      13.635 -21.268  -2.700  0.00  0.00      A    H
ATOM     99  CB  GLN A   7      15.427 -20.793  -3.818  0.00  0.00      A    C
ATOM    100  HB1 GLN A   7      14.913 -20.850  -4.801  0.00  0.00      A    H
ATOM    101  HB2 GLN A   7      16.469 -21.149  -3.970  0.00  0.00      A    H
ATOM    102  CG  GLN A   7      15.341 -19.257  -3.585  0.00  0.00      A    C
ATOM    103  HG1 GLN A   7      15.749 -18.745  -4.482  0.00  0.00      A    H
ATOM    104  HG2 GLN A   7      15.993 -19.055  -2.709  0.00  0.00      A    H
ATOM    105  CD  GLN A   7      13.928 -18.669  -3.353  0.00  0.00      A    C
ATOM    106  OE1 GLN A   7      13.590 -18.141  -2.342  0.00  0.00      A    O
ATOM    107  NE2 GLN A   7      13.089 -18.718  -4.448  0.00  0.00      A    N
ATOM    108 HE21 GLN A   7      12.144 -18.411  -4.338  0.00  0.00      A    H
ATOM    109 HE22 GLN A   7      13.447 -19.069  -5.314  0.00  0.00      A    H
ATOM    110  C   GLN A   7      14.512 -23.120  -3.445  0.00  0.00      A    C
ATOM    111  O   GLN A   7      13.529 -23.412  -4.130  0.00  0.00      A    O
ATOM    112  N   GLN A   8      15.348 -24.052  -3.016  0.00  0.00      A    N
ATOM    113  HN  GLN A   8      15.992 -23.810  -2.294  0.00  0.00      A    H
ATOM    114  CA  GLN A   8      15.346 -25.453  -3.398  0.00  0.00      A    C
ATOM    115  HA  GLN A   8      14.422 -25.586  -3.942  0.00  0.00      A    H
ATOM    116  CB  GLN A   8      16.616 -25.832  -4.178  0.00  0.00      A    C
ATOM    117  HB1 GLN A   8      16.596 -26.918  -4.413  0.00  0.00      A    H
ATOM    118  HB2 GLN A   8      17.533 -25.608  -3.593  0.00  0.00      A    H
ATOM    119  CG  GLN A   8      16.699 -25.213  -5.624  0.00  0.00      A    C
ATOM    120  HG1 GLN A   8      17.580 -25.525  -6.224  0.00  0.00      A    H
ATOM    121  HG2 GLN A   8      16.963 -24.137  -5.534  0.00  0.00      A    H
ATOM    122  CD  GLN A   8      15.485 -25.293  -6.555  0.00  0.00      A    C
ATOM    123  OE1 GLN A   8      14.832 -24.279  -6.773  0.00  0.00      A    O
ATOM    124  NE2 GLN A   8      15.236 -26.535  -7.108  0.00  0.00      A    N
ATOM    125 HE21 GLN A   8      16.041 -27.110  -7.256  0.00  0.00      A    H
ATOM    126 HE22 GLN A   8      14.518 -26.614  -7.799  0.00  0.00      A    H
ATOM    127  C   GLN A   8      15.319 -26.303  -2.158  0.00  0.00      A    C
ATOM    128  O   GLN A   8      15.674 -25.833  -1.086  0.00  0.00      A    O
ATOM    129  N   GLN A   9      14.947 -27.643  -2.254  0.00  0.00      A    N
ATOM    130  HN  GLN A   9      14.569 -27.896  -3.141  0.00  0.00      A    H
ATOM    131  CA  GLN A   9      14.989 -28.625  -1.195  0.00  0.00      A    C
ATOM    132  HA  GLN A   9      14.432 -28.156  -0.398  0.00  0.00      A    H
ATOM    133  CB  GLN A   9      14.220 -29.970  -1.534  0.00  0.00      A    C
ATOM    134  HB1 GLN A   9      14.614 -30.832  -0.954  0.00  0.00      A    H
ATOM    135  HB2 GLN A   9      14.367 -30.302  -2.584  0.00  0.00      A    H
ATOM    136  CG  GLN A   9      12.742 -29.988  -1.213  0.00  0.00      A    C
ATOM    137  HG1 GLN A   9      12.568 -29.620  -0.180  0.00  0.00      A    H
ATOM    138  HG2 GLN A   9      12.307 -31.010  -1.231  0.00  0.00      A    H
ATOM    139  CD  GLN A   9      11.808 -29.138  -2.148  0.00  0.00      A    C
ATOM    140  OE1 GLN A   9      11.279 -28.084  -1.851  0.00  0.00      A    O
ATOM    141  NE2 GLN A   9      11.574 -29.678  -3.358  0.00  0.00      A    N
ATOM    142 HE21 GLN A   9      10.959 -29.148  -3.941  0.00  0.00      A    H
ATOM    143 HE22 GLN A   9      11.925 -30.597  -3.540  0.00  0.00      A    H
ATOM    144  C   GLN A   9      16.346 -29.039  -0.583  0.00  0.00      A    C
ATOM    145  O   GLN A   9      17.436 -29.185  -1.130  0.00  0.00      A    O
ATOM    146  N   GLN A  10      16.336 -29.286   0.754  0.00  0.00      A    N
ATOM    147  HN  GLN A  10      15.504 -29.062   1.255  0.00  0.00      A    H
ATOM    148  CA  GLN A  10      17.484 -29.514   1.625  0.00  0.00      A    C
ATOM    149  HA  GLN A  10      18.394 -29.332   1.072  0.00  0.00      A    H
ATOM    150  CB  GLN A  10      17.587 -28.460   2.763  0.00  0.00      A    C
ATOM    151  HB1 GLN A  10      18.531 -28.703   3.297  0.00  0.00      A    H
ATOM    152  HB2 GLN A  10      16.653 -28.602   3.347  0.00  0.00      A    H
ATOM    153  CG  GLN A  10      17.735 -26.991   2.217  0.00  0.00      A    C
ATOM    154  HG1 GLN A  10      18.132 -26.479   3.119  0.00  0.00      A    H
ATOM    155  HG2 GLN A  10      16.739 -26.598   1.920  0.00  0.00      A    H
ATOM    156  CD  GLN A  10      18.789 -26.873   1.156  0.00  0.00      A    C
ATOM    157  OE1 GLN A  10      19.960 -27.254   1.451  0.00  0.00      A    O
ATOM    158  NE2 GLN A  10      18.461 -26.317  -0.052  0.00  0.00      A    N
ATOM    159 HE21 GLN A  10      19.238 -26.281  -0.681  0.00  0.00      A    H
ATOM    160 HE22 GLN A  10      17.502 -26.248  -0.327  0.00  0.00      A    H
ATOM    161  C   GLN A  10      17.456 -30.927   2.112  0.00  0.00      A    C
ATOM    162  O   GLN A  10      16.620 -31.793   1.727  0.00  0.00      A    O
ATOM    163  N   GLN A  11      18.306 -31.337   2.982  0.00  0.00      A    N
ATOM    164  HN  GLN A  11      19.021 -30.711   3.283  0.00  0.00      A    H
ATOM    165  CA  GLN A  11      18.365 -32.688   3.560  0.00  0.00      A    C
ATOM    166  HA  GLN A  11      17.656 -33.371   3.115  0.00  0.00      A    H
ATOM    167  CB  GLN A  11      19.849 -33.228   3.451  0.00  0.00      A    C
ATOM    168  HB1 GLN A  11      19.943 -34.223   3.937  0.00  0.00      A    H
ATOM    169  HB2 GLN A  11      20.510 -32.481   3.940  0.00  0.00      A    H
ATOM    170  CG  GLN A  11      20.370 -33.437   1.980  0.00  0.00      A    C
ATOM    171  HG1 GLN A  11      21.404 -33.841   1.934  0.00  0.00      A    H
ATOM    172  HG2 GLN A  11      20.143 -32.477   1.468  0.00  0.00      A    H
ATOM    173  CD  GLN A  11      19.548 -34.510   1.190  0.00  0.00      A    C
ATOM    174  OE1 GLN A  11      19.740 -35.689   1.501  0.00  0.00      A    O
ATOM    175  NE2 GLN A  11      18.813 -34.120   0.173  0.00  0.00      A    N
ATOM    176 HE21 GLN A  11      18.223 -34.780  -0.292  0.00  0.00      A    H
ATOM    177 HE22 GLN A  11      18.604 -33.172  -0.066  0.00  0.00      A    H
ATOM    178  C   GLN A  11      17.958 -32.636   5.062  0.00  0.00      A    C
ATOM    179  O   GLN A  11      17.782 -31.541   5.683  0.00  0.00      A    O
ATOM    180  N   GLN A  12      17.636 -33.808   5.629  0.00  0.00      A    N
ATOM    181  HN  GLN A  12      17.692 -34.670   5.132  0.00  0.00      A    H
ATOM    182  CA  GLN A  12      17.010 -33.928   6.940  0.00  0.00      A    C
ATOM    183  HA  GLN A  12      17.155 -33.034   7.529  0.00  0.00      A    H
ATOM    184  CB  GLN A  12      15.503 -34.274   6.662  0.00  0.00      A    C
ATOM    185  HB1 GLN A  12      15.084 -34.428   7.679  0.00  0.00      A    H
ATOM    186  HB2 GLN A  12      15.566 -35.215   6.075  0.00  0.00      A    H
ATOM    187  CG  GLN A  12      14.766 -33.195   5.921  0.00  0.00      A    C
ATOM    188  HG1 GLN A  12      15.028 -33.040   4.853  0.00  0.00      A    H
ATOM    189  HG2 GLN A  12      14.974 -32.224   6.419  0.00  0.00      A    H
ATOM    190  CD  GLN A  12      13.325 -33.616   5.987  0.00  0.00      A    C
ATOM    191  OE1 GLN A  12      12.908 -34.766   5.804  0.00  0.00      A    O
ATOM    192  NE2 GLN A  12      12.477 -32.596   6.276  0.00  0.00      A    N
ATOM    193 HE21 GLN A  12      11.529 -32.900   6.369  0.00  0.00      A    H
ATOM    194 HE22 GLN A  12      12.617 -31.662   5.948  0.00  0.00      A    H
ATOM    195  C   GLN A  12      17.542 -35.157   7.777  0.00  0.00      A    C
ATOM    196  O   GLN A  12      18.137 -36.016   7.157  0.00  0.00      A    O
ATOM    197  N   LYS A  13      17.393 -35.298   9.125  0.00  0.00      A    N
ATOM    198  HN  LYS A  13      16.962 -34.487   9.513  0.00  0.00      A    H
ATOM    199  CA  LYS A  13      17.419 -36.533   9.909  0.00  0.00      A    C
ATOM    200  HA  LYS A  13      18.320 -37.108   9.754  0.00  0.00      A    H
ATOM    201  CB  LYS A  13      17.616 -36.380  11.427  0.00  0.00      A    C
ATOM    202  HB1 LYS A  13      17.398 -37.307  12.000  0.00  0.00      A    H
ATOM    203  HB2 LYS A  13      16.928 -35.580  11.777  0.00  0.00      A    H
ATOM    204  CG  LYS A  13      19.041 -36.081  11.885  0.00  0.00      A    C
ATOM    205  HG1 LYS A  13      19.598 -36.989  11.570  0.00  0.00      A    H
ATOM    206  HG2 LYS A  13      19.080 -35.893  12.979  0.00  0.00      A    H
ATOM    207  CD  LYS A  13      19.703 -34.722  11.421  0.00  0.00      A    C
ATOM    208  HD1 LYS A  13      19.474 -34.738  10.334  0.00  0.00      A    H
ATOM    209  HD2 LYS A  13      20.801 -34.753  11.585  0.00  0.00      A    H
ATOM    210  CE  LYS A  13      19.089 -33.493  12.056  0.00  0.00      A    C
ATOM    211  HE1 LYS A  13      19.234 -33.313  13.142  0.00  0.00      A    H
ATOM    212  HE2 LYS A  13      17.988 -33.558  11.917  0.00  0.00      A    H
ATOM    213  NZ  LYS A  13      19.528 -32.226  11.348  0.00  0.00      A    N
ATOM    214  HZ1 LYS A  13      19.347 -32.343  10.331  0.00  0.00      A    H
ATOM    215  HZ2 LYS A  13      18.843 -31.535  11.717  0.00  0.00      A    H
ATOM    216  HZ3 LYS A  13      20.462 -31.802  11.518  0.00  0.00      A    H
ATOM    217  C   LYS A  13      16.269 -37.390   9.576  0.00  0.00      A    C
ATOM    218  O   LYS A  13      15.103 -36.952   9.521  0.00  0.00      A    O
ATOM    219  N   LYS A  14      16.456 -38.704   9.289  0.00  0.00      A    N
ATOM    220  HN  LYS A  14      17.341 -39.126   9.469  0.00  0.00      A    H
ATOM    221  CA  LYS A  14      15.417 -39.657   8.872  0.00  0.00      A    C
ATOM    222  HA  LYS A  14      14.576 -39.093   8.496  0.00  0.00      A    H
ATOM    223  CB  LYS A  14      15.935 -40.751   7.813  0.00  0.00      A    C
ATOM    224  HB1 LYS A  14      15.092 -41.467   7.706  0.00  0.00      A    H
ATOM    225  HB2 LYS A  14      16.759 -41.306   8.312  0.00  0.00      A    H
ATOM    226  CG  LYS A  14      16.413 -40.247   6.463  0.00  0.00      A    C
ATOM    227  HG1 LYS A  14      16.707 -41.050   5.754  0.00  0.00      A    H
ATOM    228  HG2 LYS A  14      17.376 -39.718   6.632  0.00  0.00      A    H
ATOM    229  CD  LYS A  14      15.509 -39.222   5.738  0.00  0.00      A    C
ATOM    230  HD1 LYS A  14      16.070 -38.786   4.883  0.00  0.00      A    H
ATOM    231  HD2 LYS A  14      15.296 -38.337   6.375  0.00  0.00      A    H
ATOM    232  CE  LYS A  14      14.189 -39.778   5.278  0.00  0.00      A    C
ATOM    233  HE1 LYS A  14      13.471 -39.748   6.125  0.00  0.00      A    H
ATOM    234  HE2 LYS A  14      14.226 -40.797   4.836  0.00  0.00      A    H
ATOM    235  NZ  LYS A  14      13.642 -38.984   4.224  0.00  0.00      A    N
ATOM    236  HZ1 LYS A  14      14.327 -38.504   3.605  0.00  0.00      A    H
ATOM    237  HZ2 LYS A  14      13.181 -39.583   3.510  0.00  0.00      A    H
ATOM    238  HZ3 LYS A  14      12.898 -38.455   4.722  0.00  0.00      A    H
ATOM    239  C   LYS A  14      14.889 -40.453  10.121  0.00  0.00      A    C
ATOM    240  OT1 LYS A  14      15.688 -40.776  11.052  0.00  0.00      A    O
ATOM    241  OT2 LYS A  14      13.670 -40.803  10.161  0.00  0.00      A    O
CONECT  239  221  240  241
CONECT  221  219  222  223  239
CONECT  223  221  224  225  226
CONECT  229  226  230  231  232
CONECT  232  229  233  234  235
CONECT  226  223  227  228  229
CONECT  222  221
CONECT  224  223
CONECT  225  223
CONECT  230  229
CONECT  231  229
CONECT  233  232
CONECT  234  232
CONECT  227  226
CONECT  228  226
CONECT  220  219
CONECT  236  235
CONECT  237  235
CONECT  238  235
CONECT  219  217  220  221
CONECT  235  232  236  237  238
CONECT  240  239
CONECT  241  239
END
